# Supplementary material for: Estimation of rate coefficients and branching ratios for gas-phase reactions of OH with aromatic organic compounds for use in automated mechanism construction
Source: Copernicus journal article supplement (doi:10.5194/acp-2018-146), 2018-02-19
Supplement: Supplementary file 1 [file SI_6_OH_aromatic hydrocarbon_preferred data.xls]

## Sheet: Notes
Pressure independent rate coefficients for OH + organic compounds
Rate coefficients in the form: k = A.exp(-E/RT) (i)
Notes on data table columns
Systematic name	systematic name of organic compound, usually based on IUPAC nomenclature
Alternative name	alternative/common names for organic compound
Carbon number	the number of carbon atoms in the organic compound
SMILES:	SMILES notation for organic compound				http://www.daylight.com/smiles/index.html
InChI:	InChI notation for organic compound				http://iupac.org/who-we-are/divisions/division-details/inchi/
k(298K):	rate coefficient at 298 K in cm3 molecule-1 s-1
A:	cm3 molecule-1 s-1
E/R:	K
Lower T	Lower bound of valid temperature range (K)
Upper T	Upper bound of valid temperature range (K)
Category:	E = evaluation; P = published; G = grey literature
Source	Source reference
Comment:	Any further information influencing the preferred value
Calculated k(298K):	rate coefficient calculated by SAR at 298 K in cm3 molecule-1 s-1

## Sheet: References
References
Alarcón et al. (2015)	Alarcón, Bohn, B. and Zetzsch, C.: Kinetic and mechanistic study of the reaction of OH radicals with methylated benzenes: 1,4-dimethyl-, 1,3,5-trimethyl-, 1,2,4,5-, 1,2,3,5- and 1,2,3,4-tetramethyl-, pentamethyl-, and hexamethylbenzene, Phys. Chem. Chem. Phys., 17, 13053-13065, 2015.
Atkinson and Arey (2003)	Atkinson, R. and Arey, J.: Atmospheric degradation of volatile organic compounds, Chem. Rev., 103, 4605-4638, 2003.
Anderson et al. (2004)	Anderson, R. S., Iannone, R., Thompson, A. E. and Rudolph, J.: Carbon kinetic isotope effects in the gas-phase reactions of aromatic hydrocarbons with the OH radical at 296 ± 4 K, Geophys. Res. Lett., 31, L15108, doi:10.1029/2004GL020089, 2004.
Aschmann et al. (2013)	Aschmann, S. M., Arey, J. and Atkinson, R.: Rate constants for the reactions of OH radicals with 1,2,4,5-tetramethylbenzene, pentamethylbenzene, 2,4,5-trimethylbenzaldehyde, 2,4,5-trimethylphenol, and 3-methyl-3-hexene-2,5-dione and products of OH + 1,2,4,5-tetramethylbenzene. J. Phys. Chem. A, 117, 2556−2568, 2013.
Bedjanian et al. (2015)	Bedjanian, Y., Morin, J. and Romanias, M. N.: Gas-phase reaction of hydroxyl radical with p-cymene over an extended temperature range, J. Phys. Chem. A, 119, 11076−11083, doi: 10.1021/ acs.jpca.5b08478, 2015.
Berndt and Böge (2001)	Berndt, T. and Böge, O: Rate constants for the gas-phase reaction of hexamethylbenzene with OH radicals and H atoms and of 1,3,5-trimethylbenzene with H atoms, Int. J. Chem. Kinet., 33, 124–129, 2001.
Bohn et al. (2012)	Bohn, B. and Zetzsch, C.: Kinetics and mechanism of the reaction of OH with the trimethylbenzenes – experimental evidence for the formation of adduct isomers, Phys. Chem. Chem. Phys., 14, 13933–13948, 2012.
Calvert et al. (2002)	Calvert, J. G., Atkinson, R., Becker, K.H., Kamens, R. M., Seinfeld, J. H., Wallington, T. J. and Yarwood, G.: Mechanisms of atmospheric oxidation of the aromatic hydrocarbons, Oxford University Press, Oxford. ISBN 0-19514628-X, 2002.
Colomb et al.(2004)	Colomb, A., Jacob, V., Kaluzny, P. and Baussand, P.: Gas-phase reactions between the OH-radical and o-, m-, p-ethyltoluene and n-nonane in air. Int. J. Chem. Kinet., 36, 367–378, 2004.
Corchnoy and Atkinson (1990)	Corchnoy, S. B. and Atkinson, R.: Kinetics of the gas-phase reactions of hydroxyl and nitrogen oxide (NO3) radicals with 2-carene, 1,8-cineole, p-cymene, and terpinolene, Environ. Sci. Technol., 24 (10), 1497–1502, 1990.
IUPAC (Date)	Preferred value of the IUPAC Task Group on Atmospheric Chemical Kinetic Data Evaluation, http://iupac.pole-ether.fr/, in September 2017 ("Date" indicates date of evaluation of specific reaction)
Lloyd et al. (1976)	Lloyd, A.C., Darnall, K. R., Winer, A. M., and Pitts, J. N., Jr: Relative rate constants for reactions of the hydroxyl radical with a series of alkanes, alkenes and aromatic hydrocarbons, J. Phys. Chem, 80, 789-794, 1976.
Mehta et al. (2009)	Mehta, D., Nguyen, A., Montenegro, A. and Li, Z.: A kinetic study of the reaction of OH with xylenes using the relative rate/discharge flow/mass spectrometry technique, J. Phys. Chem. A, 113, 12942–12951, 2009.
Ohta and Ohyama (1985)	Ohta, T. and Ohyama, T.: A set of rate constants for the reactions of OH radicals with aromatic hydrocarbons, B. Chem. Soc. Jpn., 58, 3029–3030, 1985.

## Sheet: monocyclic aromatic hydrocarbon
Systematic name	Aternative name	Carbon number	SMILES	InChI	Reagent	k(298K)	A	E/R	Lower T	Upper T	Category	Source	Comment	Calculated k(298K)
benzene and methyl-substituted benzenes
benzene		6	C1=CC=CC=C1	1S/C6H6/c1-2-4-6-5-3-1/h1-6H	OH	1.2e-12	2.27e-12	190	230	350	E	IUPAC (August 2008)	Value of "A" scaled slightly to return preferred k(298)	1.2e-12
methylbenzene	toluene	7	CC1=CC=CC=C1	1S/C7H8/c1-7-5-3-2-4-6-7/h2-6H,1H3	OH	5.6e-12	1.79e-12	-340	210	350	E	IUPAC (August 2008)	Value of "A" scaled slightly to return preferred k(298)	5.571e-12
1,2-dimethylbenzene	o-xylene	8	CC1=C(C)C=CC=C1	1S/C8H10/c1-7-5-3-4-6-8(7)2/h3-6H,1-2H3	OH	1.32e-11					E	see comment	Based on studies contributing to the recommendations of Calvert et al. (2002) and Atkinson and Arey (2003); Anderson et al. (2004) and Mehta et al. (2009)	1.36112e-11
1,3-dimethylbenzene	m-xylene	8	CC1=CC(C)=CC=C1	1S/C8H10/c1-7-4-3-5-8(2)6-7/h3-6H,1-2H3	OH	2.29e-11					E	see comment	Based on studies contributing to the recommendations of Calvert et al. (2002) and Atkinson and Arey (2003); and Mehta et al. (2009)	2.3386e-11
1,4-dimethylbenzene	p-xylene	8	CC1=CC=C(C)C=C1	1S/C8H10/c1-7-3-5-8(2)6-4-7/h3-6H,1-2H3	OH	1.38e-11	8.07e-12	-160	298	350	E	see comment	Based on studies contributing to the recommendations of Calvert et al. (2002) and Atkinson and Arey (2003); Anderson et al. (2004), Mehta et al. (2009) and Alarcon et al. (2015)	1.36112e-11
1,2,3-trimethylbenzene		9	CC1=C(C)C(C)=CC=C1	1S/C9H12/c1-7-5-4-6-8(2)9(7)3/h4-6H,1-3H3	OH	3.08e-11	3.84e-12	-620	275	340	E	see comment	Based on studies contributing to the recommendations of Calvert et al. (2002) and Atkinson and Arey (2003); and Bohn et al. (2012)	3.08218e-11
1,2,4-trimethylbenzene		9	CC1=C(C)C=C(C)C=C1	1S/C9H12/c1-7-4-5-8(2)9(3)6-7/h4-6H,1-3H3	OH	3.21e-11	2.77e-12	-730	275	340	E	see comment	Based on studies contributing to the recommendations of Calvert et al. (2002) and Atkinson and Arey (2003); and Bohn et al. (2012)	3.08218e-11
1,3,5-trimethylbenzene		9	CC1=CC(C)=CC(C)=C1	1S/C9H12/c1-7-4-8(2)6-9(3)5-7/h4-6H,1-3H3	OH	6e-11	1.12e-11	-500	275	350	E	see comment	Based on studies contributing to the recommendations of Calvert et al. (2002) and Atkinson and Arey (2003); Bohn et al. (2012) and Alarcon et al. (2015)	5.9553e-11
1,2,3,4-tetramethylbenzene		10	CC1=CC=C(C)C(C)=C1C	1S/C10H14/c1-7-5-6-8(2)10(4)9(7)3/h5-6H,1-4H3	OH	6e-11	3.83e-12	-820	298	350	P	Alarcón et al. (2015)	Values scaled to be consistent with 1,3,5-trimethylbenzene recommendation at 298 K	5.77542e-11
1,2,3,5-tetramethylbenzene		10	CC1=CC(C)=C(C)C(C)=C1	1S/C10H14/c1-7-5-8(2)10(4)9(3)6-7/h5-6H,1-4H3	OH	5.8e-11	1.92e-11	-330	298	350	P	Alarcón et al. (2015)	Values scaled to be consistent with 1,3,5-trimethylbenzene recommendation at 298 K	5.95225e-11
1,2,4,5-tetramethylbenzene		10	CC1=C(C)C=C(C)C(C)=C1	1S/C10H14/c1-7-5-9(3)10(4)6-8(7)2/h5-6H,1-4H3	OH	5.5e-11	1.28e-12	-1120	298	350	E	see comment	Based on Aschmann et al. (2013) and Alarcon et al. (2015)	5.77542e-11
pentamethylbenzene		11	CC1=CC(C)=C(C)C(C)=C1C	1S/C11H16/c1-7-6-8(2)10(4)11(5)9(7)3/h6H,1-5H3	OH	1.03e-10	3.84e-12	-980	298	350	E	see comment	Based on Aschmann et al. (2013) and Alarcon et al. (2015)	9.95711e-11
hexamethylbenzene		12	CC1=C(C)C(C)=C(C)C(C)=C1C	1S/C12H18/c1-7-8(2)10(4)12(6)11(5)9(7)3/h1-6H3	OH	1.28e-10	1.89e-11	-570	298	350	E	see comment	Based on Berndt and Boge (2001) and Alarcon et al. (2015)	1.27906e-10
higher alkyl-substituted benzenes
ethylbenzene		8	CCC1=CC=CC=C1	1S/C8H10/c1-2-8-6-4-3-5-7-8/h3-7H,2H2,1H3	OH	6.4e-12					E	see comment	Based on Lloyd et al. (1976), Ohta and Ohyama (1985) and Anderson et al. (2004)	5.5951e-12
1-ethyl-2-methylbenzene	o-ethyltoluene	9	CC1=CC=CC=C1CC	1S/C9H12/c1-3-9-7-5-4-6-8(9)2/h4-7H,3H2,1-2H3	OH	1.32e-11					E	see comment	Based on studies summarised by Colomb et al. (2004)	1.36438e-11
1-ethyl-3-methylbenzene	m-ethyltoluene	9	CCC1=CC=CC(C)=C1	1S/C9H12/c1-3-9-6-4-5-8(2)7-9/h4-7H,3H2,1-2H3	OH	2.01e-11					E	see comment	Based on studies summarised by Colomb et al. (2004)	2.13275e-11
1-ethyl-4-methylbenzene	p-ethyltoluene	9	CCC1=CC=C(C)C=C1	1S/C9H12/c1-3-9-6-4-8(2)5-7-9/h4-7H,3H2,1-2H3	OH	1.33e-11					E	see comment	Based on studies summarised by Colomb et al. (2004)	1.36438e-11
n-propylbenzene		9	CCCC1=CC=CC=C1	1S/C9H12/c1-2-6-9-7-4-3-5-8-9/h3-5,7-8H,2,6H2,1H3	OH	5.8e-12					E	Atkinson and Arey (2003)		6.7272e-12
i-propylbenzene		9	CC(C)C1=CC=CC=C1	1S/C9H12/c1-8(2)9-6-4-3-5-7-9/h3-8H,1-2H3	OH	6.3e-12					E	Atkinson and Arey (2003)		6.3164e-12
4-isopropyltoluene	p-cymene	10	CC(C)C1=CC=C(C)C=C1	1S/C10H14/c1-8(2)10-6-4-9(3)5-7-10/h4-8H,1-3H3	OH	1.47e-11	1.72e-12	-640	240	320	E	see comment	Based on Corchnoy and Atkinson (1990), Alarcon et al. (2014) and Bedjanian et al. (2015)	1.47231e-11
tert-butylbenzene		10	CC(C)(C)C1=CC=CC=C1	1S/C10H14/c1-10(2,3)9-7-5-4-6-8-9/h4-8H,1-3H3	OH	4.5e-12					E	Atkinson and Arey (2003)		4.5201e-12
alkenylbenzenes
ethenylbenzene	styrene	8	C=CC1=CC=CC=C1		OH	5.8e-11	9.8e-12	-530			E	Atkinson and Arey (2003)		5.8e-11
isopropenylbenzene	a-methylstyrene	9	C=C(C)C1=CC=CC=C1		OH	5.1e-11					E	Atkinson and Arey (2003)		5.8325e-11
propenylbenzene	b-methylstyrene	9	CC=CC1=CC=CC=C1		OH	5.7e-11					E	Atkinson and Arey (2003)		5.8806e-11
(2-methylpropenyl)benzene	b,b-dimethylstyrene	10	C/C(C)=C/C1=CC=CC=C1		OH	3.2e-11					E	Atkinson and Arey (2003)		5.9612e-11
		number of entries
		25
